# Supplementary material for: Dynamic Landscapes in the UK Driven by Pressures from Energy Production and Forestry—Results of the CORINE Land Cover Map 2018
Source: MDPI journal article supplement (doi:10.3390/land11020192), 2022-01-26
Supplement: s1 [file s1]

Table S1. Change matrix 2012 (vertical) to 2018 (horizontal), showing the total area (Ha) of each change.

| CLC<br>code | 111 | 112  | 121  | 122  | 123 | 124 | 131  | 132 | 133  | 141 | 142  | 211  | 222 | 231  | 243 | 311  | 312  | 313  | 321  | 322  | 323   | 324   | 332 | 333 | 334 | 411 | 412 | 421 | 423 | 512    | Total |
|-------------|-----|------|------|------|-----|-----|------|-----|------|-----|------|------|-----|------|-----|------|------|------|------|------|-------|-------|-----|-----|-----|-----|-----|-----|-----|--------|-------|
| 112         |     |      |      |      |     |     |      |     | 292  | 6   | 5    |      |     |      |     |      |      |      |      |      |       |       |     |     |     |     |     |     |     |        | 304   |
| 121         |     | 190  |      |      |     |     |      |     | 1289 |     |      |      |     | 152  |     |      |      |      | 10   |      |       |       |     |     |     |     |     |     |     |        | 1640  |
| 122         |     |      |      |      |     |     |      |     | 36   |     |      |      |     |      |     |      |      |      |      |      |       |       |     |     |     |     |     |     |     |        | 36    |
| 123         |     |      |      |      |     |     |      |     | 8    |     |      |      |     |      |     |      |      |      |      |      |       |       |     |     |     |     |     |     |     |        | 8     |
| 124         |     | 17   | 483  |      |     |     |      |     | 225  |     |      |      |     | 67   |     |      |      |      |      |      |       |       |     |     |     |     |     |     |     |        | 792   |
| 131         |     | 134  | 186  |      |     |     |      |     | 143  |     | 66   | 682  |     | 3186 | 83  |      |      |      | 1383 | 573  |       | 208   | 12  | 182 |     | 202 |     |     | 778 | 7819   |       |
| 132         |     |      | 26   |      |     |     |      |     | 81   |     | 56   |      |     | 910  |     |      |      |      | 436  | 116  |       | 85    |     | 31  |     |     |     |     |     | 1742   |       |
| 133         | 21  | 5867 | 3314 | 215  | 85  |     |      |     |      | 183 | 473  | 130  |     | 575  |     |      |      |      | 137  |      |       |       | 10  | 11  |     | 314 | 14  |     | 125 | 11473  |       |
| 141         | 8   | 362  | 179  | 40   |     |     | 41   |     | 525  |     | 11   |      |     |      |     |      |      |      |      |      |       |       |     |     |     |     |     |     |     | 1165   |       |
| 142         |     | 134  | 75   |      |     |     |      |     | 576  | 11  |      | 90   |     | 73   |     | 17   |      |      | 17   |      |       | 25    |     |     |     |     |     |     |     | 1017   |       |
|             |     |      | 1282 |      |     |     |      |     | 1087 |     |      |      |     |      |     |      |      |      |      |      |       |       |     |     |     |     |     |     |     |        |       |
| 211         |     | 2805 | 7    | 486  | 15  | 7   | 3094 | 144 | 4    |     | 260  |      | 307 | 1118 |     | 21   | 23   |      |      |      | 518   |       |     |     |     | 215 |     | 575 |     | 209    | 33498 |
| 222         |     | 6    |      |      |     |     |      |     |      |     |      | 55   |     |      |     |      |      |      |      |      |       |       |     |     |     |     |     |     |     | 61     |       |
| 231         |     | 2495 | 5655 | 878  | 9   | 24  | 1345 | 35  | 7073 | 35  | 107  | 2989 | 38  |      | 5   | 16   | 9    |      | 25   | 125  |       | 299   |     |     |     | 217 |     | 106 | 39  | 21524  |       |
| 242         |     | 45   | 64   |      |     |     |      |     | 35   |     |      |      |     |      |     |      |      |      |      |      |       |       |     |     |     |     |     |     |     | 145    |       |
| 243         |     | 24   | 41   |      |     |     |      | 10  | 102  |     | 15   | 39   |     |      |     | 51   |      |      |      |      |       |       |     |     |     |     |     |     |     | 281    |       |
| 311         |     | 59   | 25   | 23   |     |     | 48   |     | 80   |     |      |      |     | 27   |     |      |      |      |      |      |       | 781   |     |     |     |     |     |     |     | 1044   |       |
|             |     |      |      |      |     |     |      |     |      |     |      |      |     |      |     |      |      |      |      |      | 12693 |       |     |     |     |     |     |     |     |        |       |
| 312         |     | 14   | 3528 | 18   |     |     | 143  |     | 250  |     |      |      |     | 10   |     |      |      | 400  |      |      | 18    | 5     |     |     |     |     |     |     |     | 131317 |       |
| 313         |     | 27   | 8    | 12   |     |     | 63   |     | 40   |     |      |      |     |      |     |      |      |      |      |      | 2482  |       |     |     |     |     |     |     |     | 2633   |       |
| 321         |     | 11   | 1762 | 38   |     |     | 248  |     | 168  |     | 14   | 65   |     | 437  | 8   |      | 54   |      |      |      | 111   |       | 21  | 62  |     |     |     |     |     | 3000   |       |
| 322         |     | 9    | 2496 | 107  |     |     | 231  |     | 125  |     | 14   | 35   |     | 308  |     |      | 64   |      | 52   |      | 346   |       |     | 104 | 88  |     |     |     |     | 3979   |       |
|             |     |      |      |      |     |     |      |     |      |     |      |      |     |      |     | 5513 |      |      |      |      |       |       |     |     |     |     |     |     |     |        |       |
| 324         |     |      | 1019 |      |     |     | 76   |     | 124  |     |      | 8    |     |      |     | 1418 | 3    | 2342 | 220  | 345  |       |       |     |     |     | 30  |     |     |     | 60716  |       |
| 332         |     |      |      |      |     |     |      |     |      |     |      |      |     |      |     |      |      |      |      |      |       |       |     | 44  |     |     |     |     |     | 44     |       |
| 333         |     |      |      |      |     |     |      |     |      |     |      |      |     | 13   |     |      |      |      | 134  | 17   |       | 53    |     |     |     |     |     |     |     | 217    |       |
| 334         |     |      |      |      |     |     |      |     |      |     |      |      |     |      |     |      |      |      | 1018 | 322  |       |       |     |     |     |     |     |     |     | 1340   |       |
| 411         |     |      |      |      |     |     |      |     |      |     |      |      |     | 197  |     |      |      |      |      |      |       |       |     |     |     |     |     |     | 69  | 266    |       |
| 412         |     |      | 3448 | 22   |     |     | 96   | 12  | 149  |     | 11   |      |     | 41   |     |      | 16   |      | 7    |      |       |       |     |     |     |     |     |     | 113 | 3915   |       |
| 421         |     |      | 9    |      |     |     |      |     | 6    |     |      |      |     |      |     |      |      |      |      |      |       |       |     |     |     |     |     |     | 127 | 142    |       |
| 423         |     |      |      |      |     |     |      |     |      |     |      |      |     |      |     |      |      |      |      |      |       |       |     |     |     |     |     | 95  |     | 95     |       |
| 512         |     |      | 6    |      |     |     | 7    |     | 5    |     |      |      |     | 48   |     |      |      |      | 26   |      |       |       |     |     |     | 16  |     |     |     | 108    |       |
| 522         |     |      | 30   |      |     |     |      |     |      |     |      |      |     |      |     |      |      |      |      |      |       |       |     |     |     |     |     |     |     | 30     |       |
| 523         |     |      | 23   |      |     |     |      |     |      |     |      |      |     |      |     |      |      |      |      |      |       |       |     |     |     |     |     |     |     | 23     |       |
|             |     | 1219 | 3520 |      |     |     |      |     | 2220 |     |      |      |     |      |     |      | 5529 |      |      |      |       | 13184 |     |     |     |     |     |     |     |        |       |
| Total       | 29  | 9    | 3    | 1840 | 108 | 31  | 5401 | 190 | 6    | 235 | 1033 | 4094 | 345 | 7161 | 96  | 1521 | 9    | 2743 | 3466 | 1498 | 18    | 3     | 23  | 392 | 181 | 965 | 14  | 775 | 196 | 1263   |       |
